# Supplementary material for: Thiamine in Anorexia nervosa Clinical Trial (TACT): Thiamine as an adjunctive treatment for Anorexia nervosa
Source: Research Square preprint supplement (doi:10.21203/rs.3.rs-7418262/v1), 2025-09-02
Supplement: Supplementary file 1 [file b76f06036d35d1ce2c6aef70.docx]

# Appendix

Appendix 1. *Lab tests and corresponding units of measurement*.

| Lab test | Unit of measurement |
| --- | --- |
| Glucose | mmol/L |
| High-density Lipoprotein Cholesterol | mmol/L |
| Low-density Lipoprotein Cholesterol | mmol/L |
| Cholesterol (plasma) | mmol/L |
| Triglycerides | mmol/L |
| Hemoglobin | g/L |
| Leukocytes | x10^9/L |
| Sodium | mmol/L |
| Potassium | mmol/L |
| Creatinine | µmol/L |
| Magnesium | mmol/L |
| Calcium | mmol/L |
| Albumin | g/L |
| Aspartate Aminotransferase | µkat/L |
| Alkaline Phosphatase | µkat/L |
| Phosphatidylethanol | μmol/L |
| Erythrocyte Transketolase Activity (Thiamine) | nkat/g |
| Thiamine Pyrophosphate Stimulation TPP | % (ref <18) |
